# Supplementary material for: Advanced therapeutic inhalation aerosols of a Nrf2 activator and RhoA/Rho kinase (ROCK) inhibitor for targeted pulmonary drug delivery in pulmonary hypertension: design, characterization, aerosolization, in vitro 2D/3D human lung cell cultures, and in vivo efficacy
Source: PubMed Central journal article supplement — Ther Adv Respir Dis. 2021 Mar 14;15:1753466621998245. doi: 10.1177/1753466621998245 (PMC7968029; doi:10.1177/1753466621998245), 2021-03-14
Supplement: sj-pdf-2-tar-10.1177_1753466621998245.pdf [file sj-pdf-2-tar-10.1177_1753466621998245.pdf]

## Author Response 2

We sincerely thank the Reviewers for helpful suggestions and comments, which we have incorporated in the revised manuscript with yellow highlighted text.

The following is our Point-By-Point response with bulleted text:

Reviewer: 1

Comments to the Author

Most of my concerns have been addressed in a good way. However, I was a bit surprised to see that the pulmonary artery pressures were higher following simvastatin administration. Was this difference significant? I would still recommend a scatterplot for Figure 13 to show individual values and variation. I can't find information on how many lambs that were included, but maybe I missed it?

- Administration of inhaled Sim did not change hemodynamics (mean pulmonary artery pressure went for 25.1 to 25.2). This statement has been added to the Results lines 793-794 for reader clarity.
- Figure 13 is plotted as a bar chart for reader clarity and is consistent with how Professor Fineman and Professor Black have reported shunt lamb hemodynamic data.
- As stated in the Experimental Method original text for the section entitled In Vivo Efficacy in the Shunt Lamb Model of PH, the text in line 474 states "a shunt lamb". One lamb was used. The lamb is a large animal model and a higher mammal. The lamb experiment is very expensive.

It also still says in the abstract that "The aerosol formulations effectively treated PH". In my opinion this is a too strong statement.

- As suggested by the Reviewer, the statement has been revised.
