# Supplementary material for: Advanced therapeutic inhalation aerosols of a Nrf2 activator and RhoA/Rho kinase (ROCK) inhibitor for targeted pulmonary drug delivery in pulmonary hypertension: design, characterization, aerosolization, in vitro 2D/3D human lung cell cultures, and in vivo efficacy
Source: PubMed Central journal article supplement — Ther Adv Respir Dis. 2021 Mar 14;15:1753466621998245. doi: 10.1177/1753466621998245 (PMC7968029; doi:10.1177/1753466621998245), 2021-03-14
Supplement: sj-pdf-4-tar-10.1177_1753466621998245.pdf [file sj-pdf-4-tar-10.1177_1753466621998245.pdf]

Reviewer 1 v.2

Comments to the Author

Most of my concerns have been addressed in a good way. However, I was a bit surprised to see that the pulmonary artery pressures were higher following simvastatin administration. Was this difference significant? I would still recommend a scatterplot for Figure 13 to show individual values and variation. I can't find information on how many lambs that were included, but maybe I missed it?

It also still says in the abstract that "The aerosol formulations effectively treated PH". In my opinion this is a too strong statement.
