# Supplementary material for: Advanced therapeutic inhalation aerosols of a Nrf2 activator and RhoA/Rho kinase (ROCK) inhibitor for targeted pulmonary drug delivery in pulmonary hypertension: design, characterization, aerosolization, in vitro 2D/3D human lung cell cultures, and in vivo efficacy
Source: PubMed Central journal article supplement — Ther Adv Respir Dis. 2021 Mar 14;15:1753466621998245. doi: 10.1177/1753466621998245 (PMC7968029; doi:10.1177/1753466621998245), 2021-03-14
Supplement: sj-pdf-5-tar-10.1177_1753466621998245.pdf [file sj-pdf-5-tar-10.1177_1753466621998245.pdf]

Reviewer 2 v.1

Comments to the Author

The authors have used healthy rats to test the safety of their aerosol formulation, and the lamb model to test the efficacy of the treatment. What about the usage of some well-known chronic models of pulmonary hypertension, such as for example monocrotaline model in rats or chronic exposure to hypoxia? I would like to see the efficacy of this aerosol formulation in one of those in vivo models. If the authors are not able to perform the suggested experiments they should clearly discuss this point and indicate this as a limitation of the study and future direction of the research.
